# Supplementary material
Source: PubMed Central journal article supplement (PMC3280134)

Late november  
2007

Stream 1

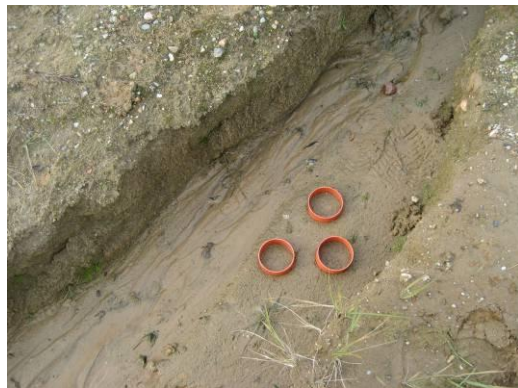

Stream 3

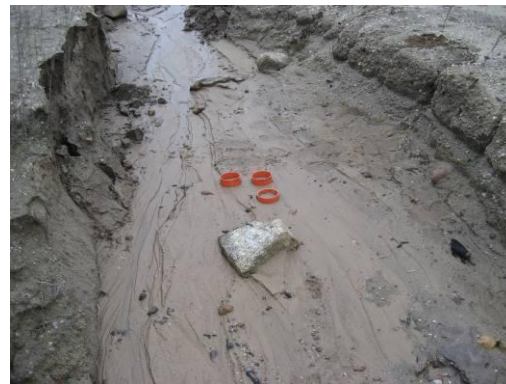

Early october  
2008

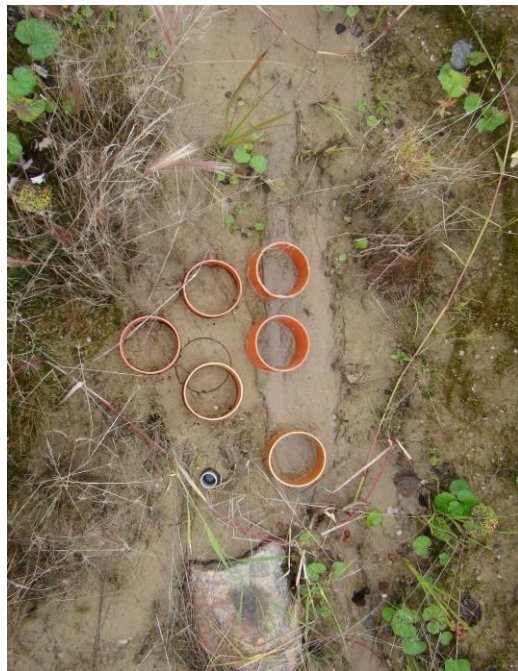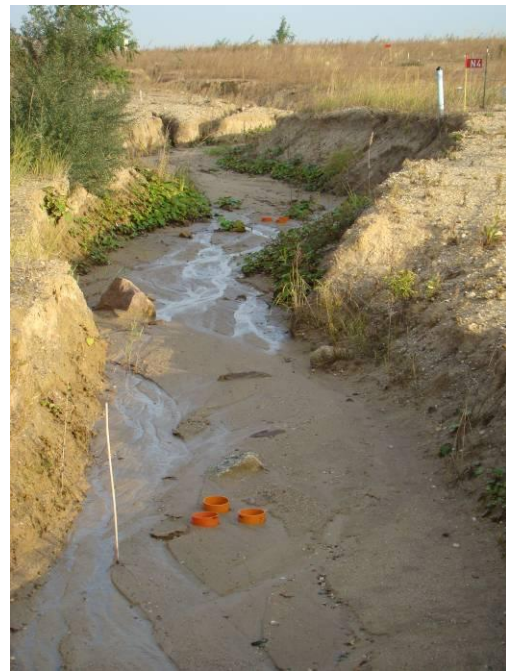

Supplement: ismej2011134x2.pdf [file ismej2011134x2.pdf]
